# Supplementary material for: Reducing police occupational needle stick injury risk following an interactive training: the SHIELD cohort study in Mexico
Source: HighWire-hosted journal article supplement (doi:10.1136/bmjopen-2020-041629), 2021-04-01
Supplement: bmjopen-2020-041629supp001_data_supplement.pdf [file bmjopen-2020-041629supp001_data_supplement.pdf]

**Supplementary Table S1. Description of Police Knowledge and Attitudinal Factors included in analysis.**

| Variable                                               | Survey Item(s)                                                                                                                                                      | Coding                                                | Reported in Table 1                       |
|--------------------------------------------------------|---------------------------------------------------------------------------------------------------------------------------------------------------------------------|-------------------------------------------------------|-------------------------------------------|
| Knowledge of HIV & Hepatitis C Transmission/Prevention | It is possible to have Hepatitis C and not know it.                                                                                                                 | Binary (Correct vs. Not)                              | Sum of all correct responses (Median/IQR) |
|                                                        | Hepatitis C can easily spread within families.                                                                                                                      |                                                       |                                           |
|                                                        | Coughing and sneezing can spread HIV.                                                                                                                               |                                                       |                                           |
|                                                        | Having sex without a condom increases a person's chance of infection with HIV.                                                                                      |                                                       |                                           |
|                                                        | If someone gets a needle stick injury they are more likely to get Hepatitis C than HIV.                                                                             |                                                       |                                           |
| Occupational NSI knowledge                             | People who have been infected with HIV quickly show obvious signs of being infected.                                                                                | Binary (Correct vs. Not)                              | Sum of all correct responses (Median/IQR) |
|                                                        | Taking a test for HIV one week after having sex will tell a person if she or he has HIV.                                                                            |                                                       |                                           |
| Law knowledge related to NSIs                          | For each of the items please choose the selection that accurately describes what a suspect can currently possess under the law of Baja California: <b>Syringes.</b> | Binary (Correct vs. Not)                              | Sum of all correct responses (Median/IQR) |
|                                                        | For each of the items please choose the selection that accurately describes what a suspect can currently possess under the law of Baja California: <b>Heroin.</b>   |                                                       |                                           |
| Attitudes on syringe access                            | Syringe exchange programs increase the risk of needle stick injuries among police.                                                                                  | Binary (disagree/neither agree nor disagree vs agree) | Sum of all (agree) responses (Median/IQR) |
|                                                        | I am worried about having an accident with hypodermic syringes while at work.                                                                                       |                                                       |                                           |
|                                                        | Decriminalizing (not punish) small amounts of drugs can increase occupational risks for the police.                                                                 |                                                       |                                           |
| Intended actions to prevent NSIs                       | Break syringes and throw in trash.                                                                                                                                  | Binary (Correct vs. Not)                              | Sum of all correct responses (Median/IQR) |
|                                                        | Ask all suspects to list any sharp items in their pockets before any search or detention.                                                                           |                                                       |                                           |
|                                                        | Use needle-stick resistant gloves when conducting pat-down searches.                                                                                                |                                                       |                                           |
|                                                        | Before I begin a search, inform all suspects about laws related to syringe and drug possession.                                                                     |                                                       |                                           |
|                                                        | Throw any syringes into the trash.                                                                                                                                  |                                                       |                                           |
|                                                        | For any syringes found during searches, separate the needle from the syringe.                                                                                       |                                                       |                                           |
| Stigma towards PWID                                    | People addicted to drugs do not care about their health.                                                                                                            | Binary (disagree/neither agree nor disagree vs agree) | Sum of all (agree) responses (Median/IQR) |
|                                                        | Drug users do not deserve to be treated as other people.                                                                                                            |                                                       |                                           |

|                                        |                                                                                                                                                                             |                                                                                                          |                                                                        |
|----------------------------------------|-----------------------------------------------------------------------------------------------------------------------------------------------------------------------------|----------------------------------------------------------------------------------------------------------|------------------------------------------------------------------------|
| Subjective norms of NSI prevention     | What I do to prevent hypodermic needle stick injuries it's similar to what the other policemen do.                                                                          | Categorical<br>(1=strongly disagree, 2=disagree, 3=neither agree or disagree, 4=agree, 5=strongly agree) | Dichotomous (Yes/No)<br>Yes=5,4<br>No=1,2,3                            |
| Supervisory support for NSI response   | I feel that my supervisor would help me get treated if I got a needle stick.                                                                                                | Categorical<br>(1=strongly disagree, 2=disagree, 3=neither agree or disagree, 4=agree, 5=strongly agree) | Dichotomous (Yes/No)<br>Yes=5,4<br>No=1,2,3                            |
| Supervisory support for NSI prevention | My superiors are engaged in reducing occupational injuries while we are on duty.                                                                                            | Categorical<br>(1=strongly disagree, 2=disagree, 3=neither agree or disagree, 4=agree, 5=strongly agree) | Dichotomous (Yes/No)<br>Yes=5,4<br>No=1,2,3                            |
| Self-Efficacy to prevent NSIs          | I am confident that I can keep from getting a needle stick while on duty.<br>I can easily get rid of hypodermic syringes in a secure form (without putting myself at risk). | Categorical<br>(1=strongly disagree, 2=disagree, 3=neither agree or disagree, 4=agree, 5=strongly agree) | Sum of all (4 [agree] or 5 [strongly agree]) responses<br>(Median/IQR) |
| Self-Efficacy to respond to NSIs       | If I have a needle stick injury on duty I know what to do.                                                                                                                  | Categorical<br>(1=strongly disagree, 2=disagree, 3=neither agree or disagree, 4=agree, 5=strongly agree) | Dichotomous (Yes/No)<br>Yes=5,4<br>No=1,2,3                            |
