# Supplementary material for: Reducing police occupational needle stick injury risk following an interactive training: the SHIELD cohort study in Mexico
Source: HighWire-hosted journal article supplement (doi:10.1136/bmjopen-2020-041629), 2021-04-01
Supplement: bmjopen-2020-041629supp002_data_supplement.pdf [file bmjopen-2020-041629supp002_data_supplement.pdf]

**Table S2. Trainee Cohort Characteristics at Baseline by Gender**

| Variable                                                        |                             | Female<br>(n=114)  | Male<br>(n=657) | Total<br>(n=771) | p-value |
|-----------------------------------------------------------------|-----------------------------|--------------------|-----------------|------------------|---------|
| Age                                                             | Median (IQR)                | 35 (29-40)         | 39 (33-44)      | 38 (33-43)       | <.001   |
| Education level completed                                       | < High school               | 21 (18.4%)         | 133 (20.2%)     | 154 (20.0%)      | 0.705   |
|                                                                 | >=High school               | 93 (81.6%)         | 524 (79.8%)     | 617 (80.0%)      |         |
| Married <sup>*1</sup>                                           | Yes                         | 54 (50.0%)         | 531 (84.4%)     | 585 (79.4%)      | <.001   |
| Rank                                                            | District                    | 12 (10.5%)         | 120 (18.3%)     | 132 (17.1%)      | 0.044   |
|                                                                 | Chief/Deputy/Supervis<br>or |                    |                 |                  |         |
|                                                                 | Officer or Lower Rank       | 102 (89.5%)        | 537 (81.7%)     | 639 (82.9%)      |         |
| Years of experience <sup>*2</sup>                               | Median (IQR)                | 9.4 (3.2-<br>12.2) | 12 (8.7-18.7)   | 11.2 (8-18.2)    | <.001   |
| Current Assignment                                              | Patrol                      | 89 (78.1%)         | 585 (89.0%)     | 674 (87.4%)      | 0.002   |
|                                                                 | Non-Patrol                  | 25 (21.9%)         | 72 (11.0%)      | 97 (12.6%)       |         |
| Current work district <sup>*3</sup>                             | Low drug use area           | 76 (67.9%)         | 445 (68.5%)     | 521 (68.4%)      | 0.913   |
|                                                                 | High drug use area          | 36 (32.1%)         | 205 (31.5%)     | 241 (31.6%)      |         |
| Contact with needles or syringes                                | Frequently                  | 41 (36.0%)         | 214 (32.6%)     | 255 (33.1%)      | 0.518   |
|                                                                 | Sometimes                   | 73 (64.0%)         | 443 (67.4%)     | 516 (66.9%)      |         |
| Ever sustained an NSI <sup>*4</sup>                             | Yes                         | 19 (16.8%)         | 100 (15.2%)     | 119 (15.5%)      | 0.673   |
|                                                                 | No                          | 94 (83.2%)         | 556 (84.8%)     | 650 (84.5%)      |         |
| STIC Score <sup>*5</sup>                                        | Median (IQR)                | 1.6 (1-2.4)        | 2 (1.4-2.6)     | 2 (1.2-2.6)      | 0.005   |
| Confiscated needles or syringes <sup>*6</sup>                   | All the time                | 9 (8.0%)           | 71 (10.8%)      | 80 (10.4%)       | 0.005   |
|                                                                 | Sometimes                   | 32 (28.3%)         | 244 (37.3%)     | 276 (35.9%)      |         |
|                                                                 | Rarely                      | 30 (26.5%)         | 198 (30.2%)     | 228 (29.7%)      |         |
|                                                                 | Never                       | 42 (37.2%)         | 142 (21.7%)     | 184 (24.0%)      |         |
| Transported syringes to the proper<br>authorities <sup>*7</sup> | All the time                | 5 (4.4%)           | 40 (6.1%)       | 45 (5.9%)        | 0.575   |
|                                                                 | Sometimes                   | 19 (16.8%)         | 130 (19.8%)     | 149 (19.4%)      |         |
|                                                                 | Rarely                      | 23 (20.4%)         | 148 (22.6%)     | 171 (22.2%)      |         |
|                                                                 | Never                       | 66 (58.4%)         | 338 (51.5%)     | 404 (52.5%)      |         |
| Has broken a needle or syringe <sup>*8</sup>                    | All the time                | 8 (7.1%)           | 50 (7.6%)       | 58 (7.5%)        | 0.004   |
|                                                                 | Sometimes                   | 14 (12.4%)         | 136 (20.7%)     | 150 (19.5%)      |         |
|                                                                 | Rarely                      | 16 (14.2%)         | 152 (23.2%)     | 168 (21.8%)      |         |
|                                                                 | Never                       | 75 (66.4%)         | 318 (48.5%)     | 393 (51.1%)      |         |
| Has thrown syringes in the trash <sup>*9</sup>                  | All the time                | 11 (9.7%)          | 59 (9.0%)       | 70 (9.1%)        | 0.924   |
|                                                                 | Sometimes                   | 24 (21.2%)         | 145 (22.1%)     | 169 (22.0%)      |         |

|                                                                   |                        |            |             |             |       |
|-------------------------------------------------------------------|------------------------|------------|-------------|-------------|-------|
| Has arrested someone for syringe possession <sup>*10</sup>        | Rarely                 | 24 (21.2%) | 155 (23.7%) | 179 (23.3%) | 0.011 |
|                                                                   | Never                  | 54 (47.8%) | 296 (45.2%) | 350 (45.6%) |       |
|                                                                   | All the time           | 8 (7.1%)   | 61 (9.3%)   | 69 (9.0%)   |       |
| Frequency of physical altercations with drug users <sup>*11</sup> | Sometimes              | 25 (22.1%) | 214 (32.7%) | 239 (31.1%) | 0.758 |
|                                                                   | Rarely                 | 24 (21.2%) | 160 (24.4%) | 184 (24.0%) |       |
|                                                                   | Never                  | 56 (49.6%) | 220 (33.6%) | 276 (35.9%) |       |
|                                                                   | All the time/Sometimes | 67 (59.3%) | 376 (57.6%) | 443 (57.8%) |       |
| Knowledge of HIV & Hepatitis C Transmission/Prevention            | Rarely/Never           | 46 (40.7%) | 277 (42.4%) | 323 (42.2%) | 0.948 |
|                                                                   | Median (IQR)           | 3 (2-4)    | 3 (2-4)     | 3 (2-4)     |       |
| Occupational NSI Knowledge                                        | Median (IQR)           | 2 (1-2)    | 2 (1-2)     | 2 (1-2)     | 0.822 |
| Attitudes on syringe access                                       | Median (IQR)           | 0 (0-1)    | 0 (0-1)     | 0 (0-1)     | 0.641 |
| Intended Actions to Prevent NSI                                   | Median (IQR)           | 4 (4-5)    | 4 (4-5)     | 4 (4-5)     | 0.926 |
| Stigma toward PWID <sup>*12</sup>                                 | Median (IQR)           | 4 (4-4)    | 4 (4-4)     | 4 (4-4)     | 0.566 |
| Subjective norms of NSI prevention <sup>*13</sup>                 | Yes                    | 65 (57.5%) | 454 (69.4%) | 519 (67.7%) | 0.016 |
|                                                                   | No                     | 48 (42.5%) | 200 (30.6%) | 248 (32.3%) |       |
| Supervisory support for NSI prevention                            | Yes                    | 56 (49.1%) | 351 (53.4%) | 407 (52.8%) | 0.417 |
|                                                                   | No                     | 58 (50.9%) | 306 (46.6%) | 364 (47.2%) |       |
| Self-Efficacy to prevent NSI <sup>*15</sup>                       | Median (IQR)           | 8 (7-9)    | 8 (7-10)    | 8 (7-10)    | 0.002 |
| Self-Efficacy to respond to NSI <sup>*16</sup>                    | Yes                    | 67 (59.3%) | 446 (68.2%) | 513 (66.9%) | 0.067 |
|                                                                   | No                     | 46 (40.7%) | 208 (31.8%) | 254 (33.1%) |       |

\*Missing observations (<sup>\*1</sup>n=34; <sup>\*2</sup>n=10; <sup>\*3</sup>n=9; <sup>\*4</sup>n=2; <sup>\*5</sup>n=2; <sup>\*6</sup>n=3; <sup>\*7</sup>n=2; <sup>\*8</sup>n=2; <sup>\*9</sup>n=3; <sup>\*10</sup>n=3; <sup>\*11</sup>n=5; <sup>\*12</sup>n=1; <sup>\*13</sup>n=4; <sup>\*14</sup>n=1; <sup>\*15</sup>n=1; <sup>\*16</sup>n=4)
