# Supplementary material for: Reducing police occupational needle stick injury risk following an interactive training: the SHIELD cohort study in Mexico
Source: HighWire-hosted journal article supplement (doi:10.1136/bmjopen-2020-041629), 2021-04-01
Supplement: bmjopen-2020-041629supp003_data_supplement.pdf [file bmjopen-2020-041629supp003_data_supplement.pdf]

**Table S3. Incidence density rates of needle stick injuries (NSIs) pre- and post-training among Tijuana police officers who were exposed to needles/syringes, stratified by gender**

| Sample  | N at risk* | N incident Cases | Pre-PEP             |                       | N at risk | N incident cases | Post-PEP            |                       |
|---------|------------|------------------|---------------------|-----------------------|-----------|------------------|---------------------|-----------------------|
|         |            |                  | Observed PY at risk | Cases/100 PY (95% CI) |           |                  | Observed PY at risk | Cases/100 PY (95% CI) |
| Overall | 764        | 9                | 608.94              | 1.48( 0.51, 2.44)     | 699       | 32               | 1259.84             | 2.54( 1.66, 3.42)     |
| Males   | 650        | 6                | 530.44              | 1.13( 0.23, 2.04)     | 602       | 30               | 1082.30             | 2.77( 1.78, 3.76)     |
| Females | 114        | 3                | 78.50               | 3.82( 0.00, 8.15)     | 97        | 2                | 177.54              | 1.13( 0.00, 2.69)     |
