# Supplementary material for: Reducing police occupational needle stick injury risk following an interactive training: the SHIELD cohort study in Mexico
Source: HighWire-hosted journal article supplement (doi:10.1136/bmjopen-2020-041629), 2021-04-01
Supplement: bmjopen-2020-041629supp005_data_supplement.pdf [file bmjopen-2020-041629supp005_data_supplement.pdf]

**Table S5. Multivariable Model for the Intervention Effect on the NSI Incidence**

| <b>Main Effects</b>                                       | <b>Contrast</b>                | <b>Adj. Incidence Rate Ratio</b> | <b>Adj. 95% CI</b> | <b>P-value</b> |
|-----------------------------------------------------------|--------------------------------|----------------------------------|--------------------|----------------|
| Period                                                    | Post-Training vs. Pre-Training | 0.24*                            | (0.05, 1.19)*      | 0.081*         |
| Gender                                                    | Male vs. Female                | 0.31*                            | (0.07, 1.32)*      | 0.113*         |
| Ever sustained an NSI prior to the beginning of the study | Yes vs. No                     | 6.97                             | (3.54, 13.70)      | <0.001         |
| Years of experience                                       | Per one year                   | 0.95                             | (0.91, 0.99)       | 0.012          |
| Period*Gender                                             | NA                             | NA                               | NA                 | 0.014          |
| <b>Simple Effects</b>                                     |                                |                                  |                    |                |
| Among females                                             | Post-Training vs. Pre-Training | 0.31                             | (0.07, 1.32)       | 0.113          |
| Among males                                               | Post-Training vs. Pre-Training | 3.00                             | (0.61, 14.8)       | 0.177          |

\*Not interpretable directly due to a significant interaction between period and gender; See Simple Effects for interpretation of the interaction.
