# Supplementary material for: Reducing police occupational needle stick injury risk following an interactive training: the SHIELD cohort study in Mexico
Source: HighWire-hosted journal article supplement (doi:10.1136/bmjopen-2020-041629), 2021-04-01

**Figure S1. Adjusted Incidence Density of NSIs per 100 PY by Period and Gender**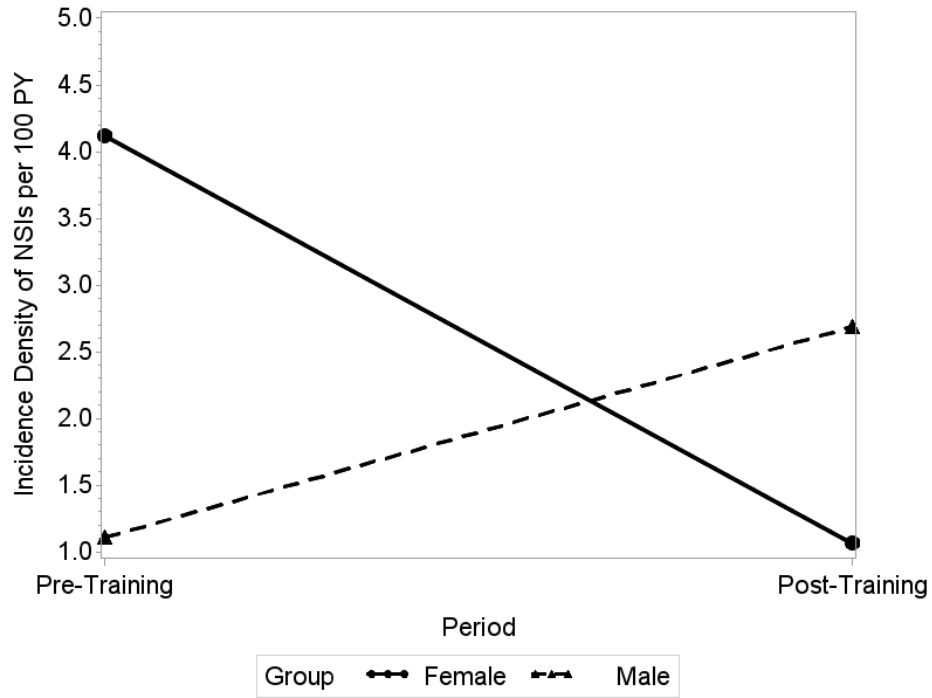

Supplement: bmjopen-2020-041629supp006_data_supplement.pdf [file bmjopen-2020-041629supp006_data_supplement.pdf]
